# Supplementary material for: A sliding-bulge structure at the Dicer processing site of pre-miRNAs regulates alternative Dicer processing to generate 5′-isomiRs
Source: PubMed Central journal article supplement — Heliyon. 2016 Sep 1;2(9):e00148. doi: 10.1016/j.heliyon.2016.e00148 (PMC5021778; doi:10.1016/j.heliyon.2016.e00148), 2016-09-01
Supplement: mmc4.pdf [file mmc4.pdf]

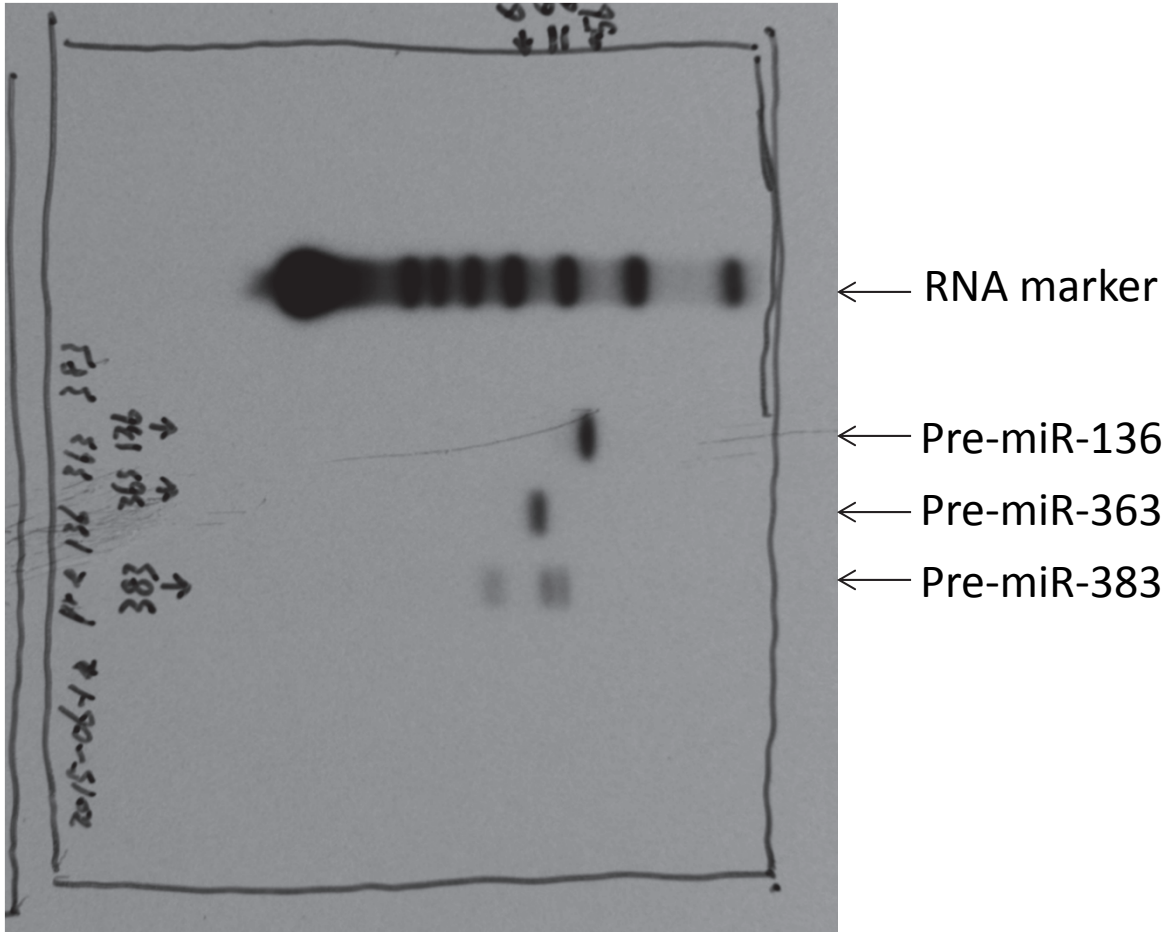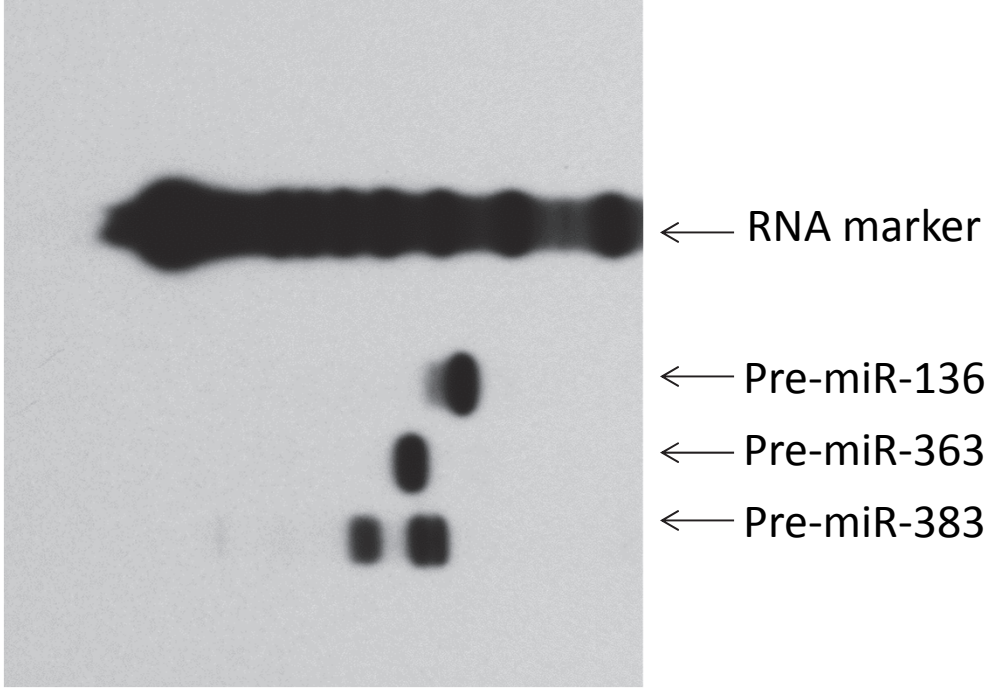

Figure 1S: Northern blot analysis of the indicated pre-miRNAs in transfected cells. Right panel is the longer exposure version.

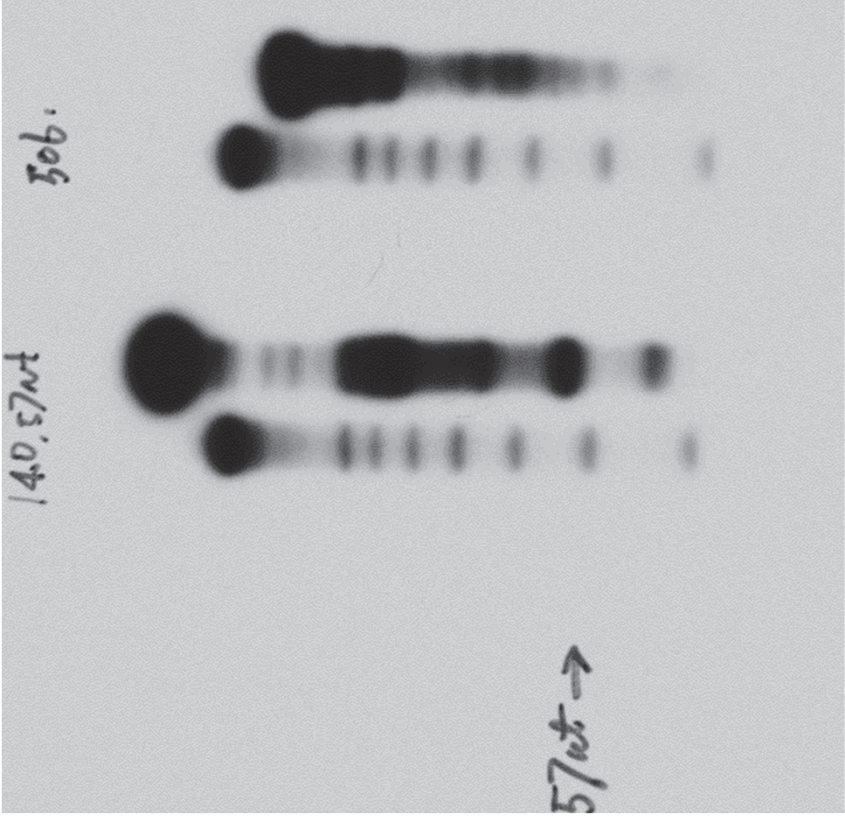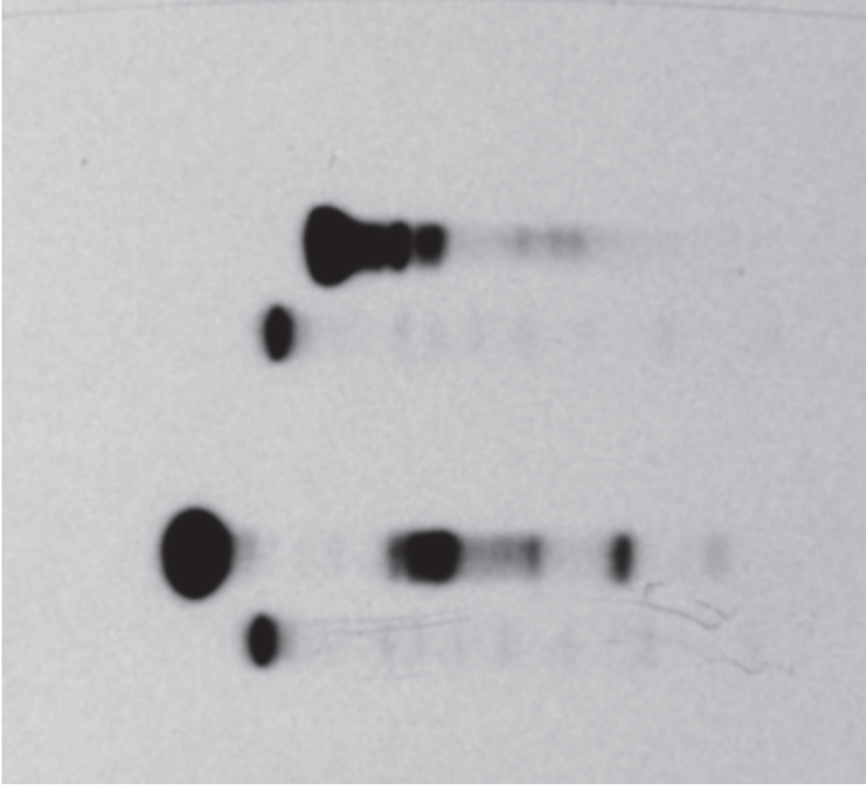

Figure 2S: Northern blot analysis of the indicated pre-miR-140 in transfected cells. Right panel is the longer exposure to show RNA marker.

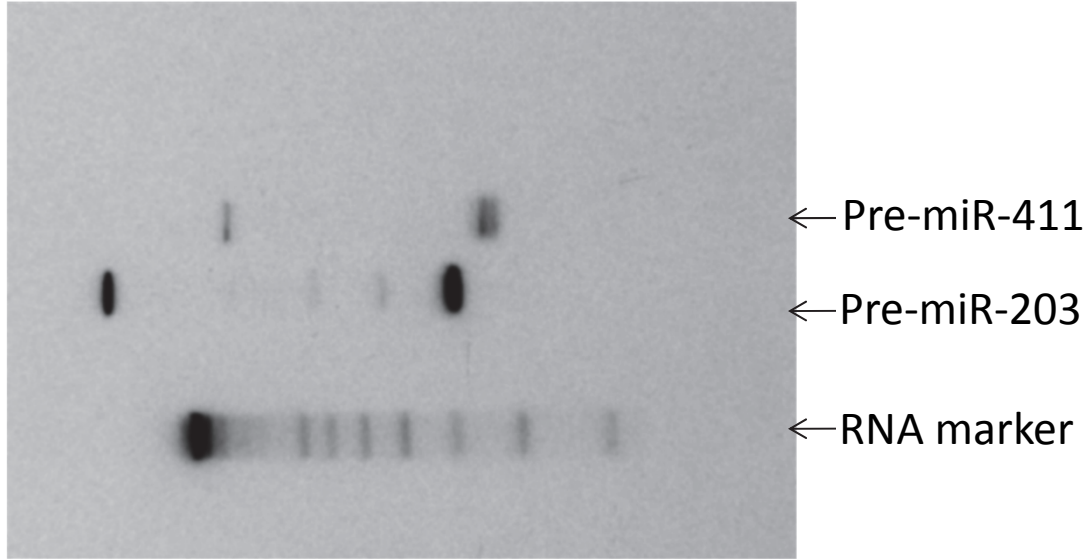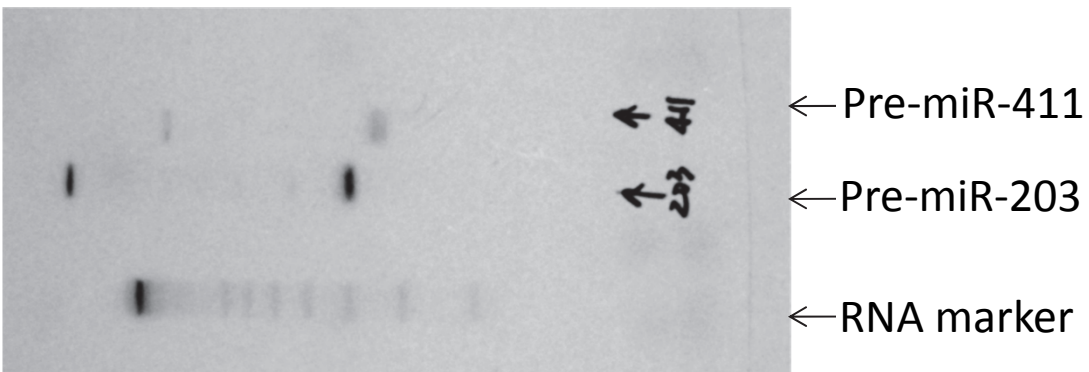

Figure 3S: Northern blot analysis of the indicated pre-miRNAs in transfected cells. Right panel is the longer exposure to show pre-miR-411

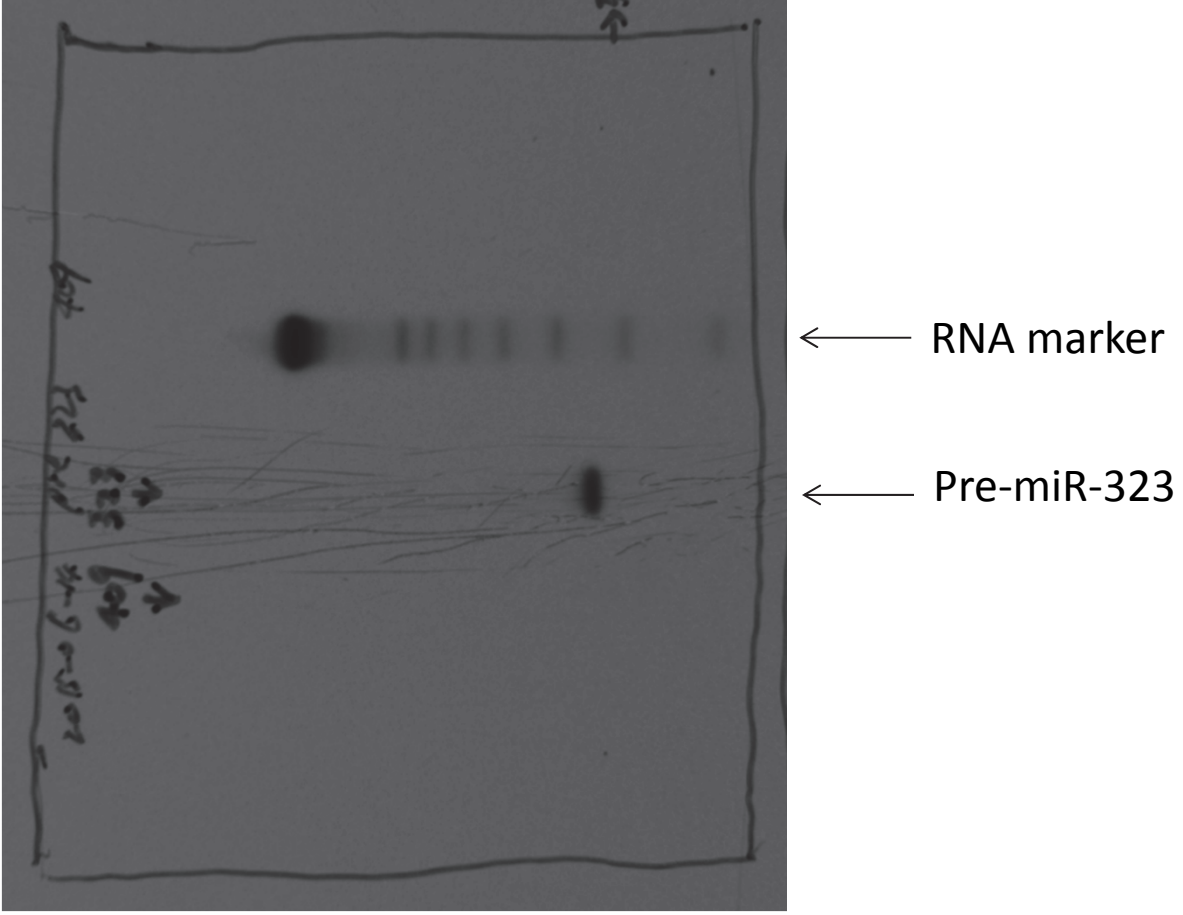

Figure 4S: Northern blot analysis of the indicated pre-miR-323 in transfected cells.

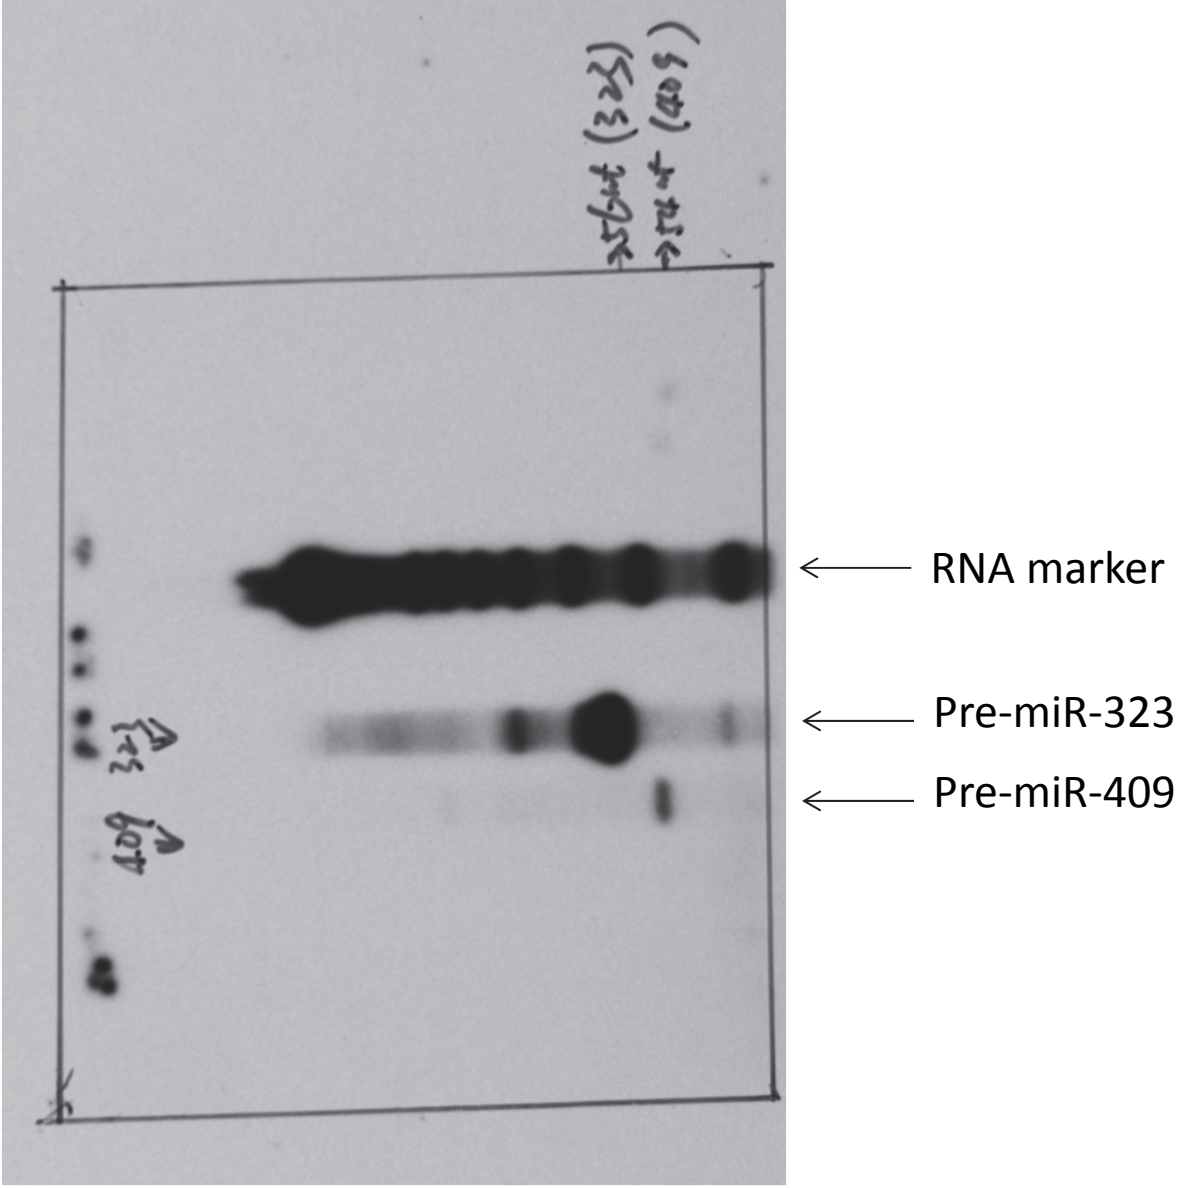

Figure 5S: Northern blot analysis of the indicated pre-miRNAs in transfected cells.



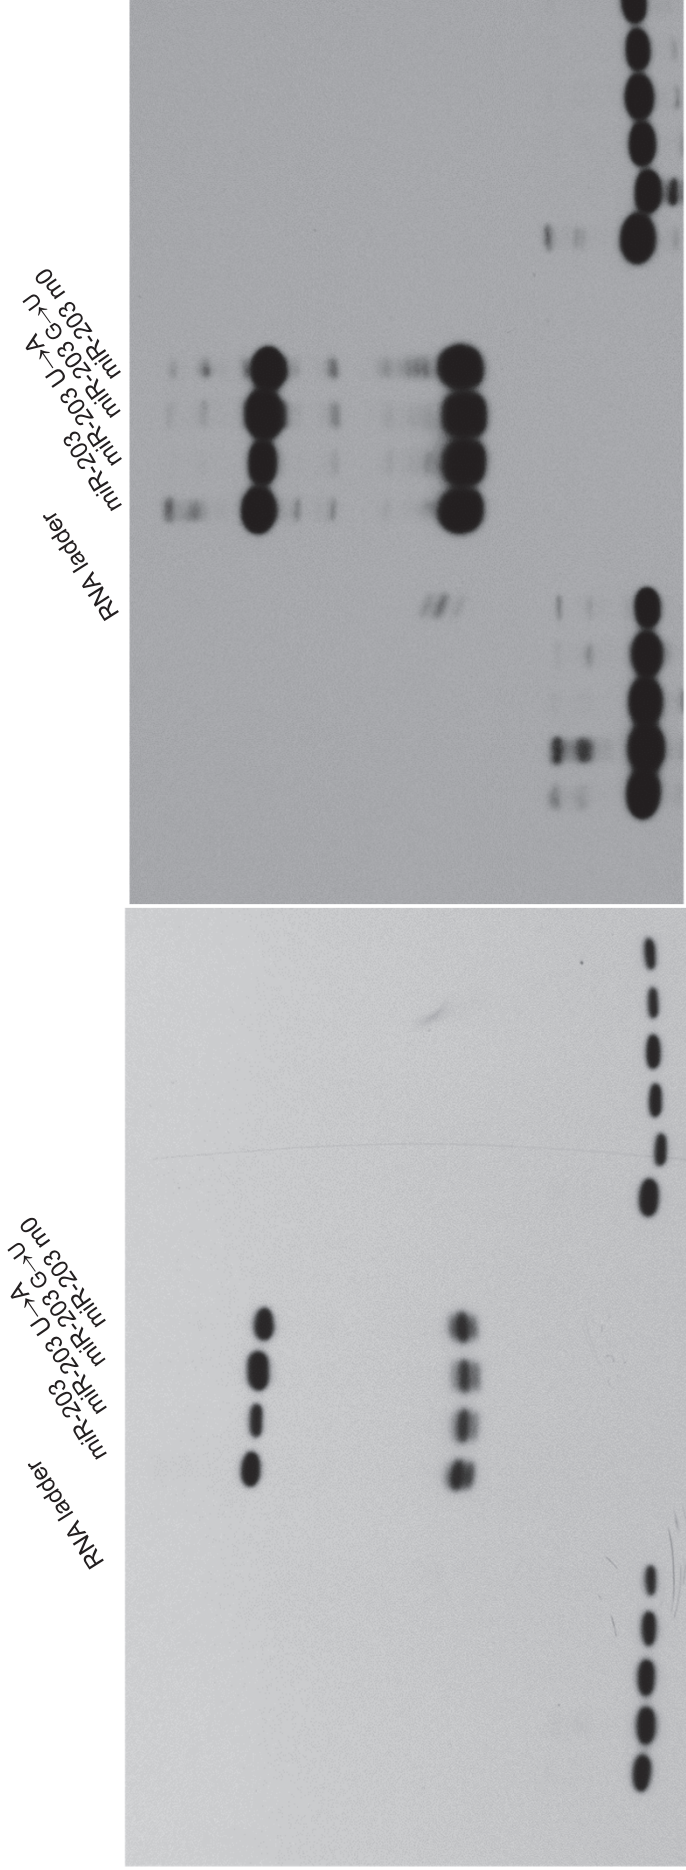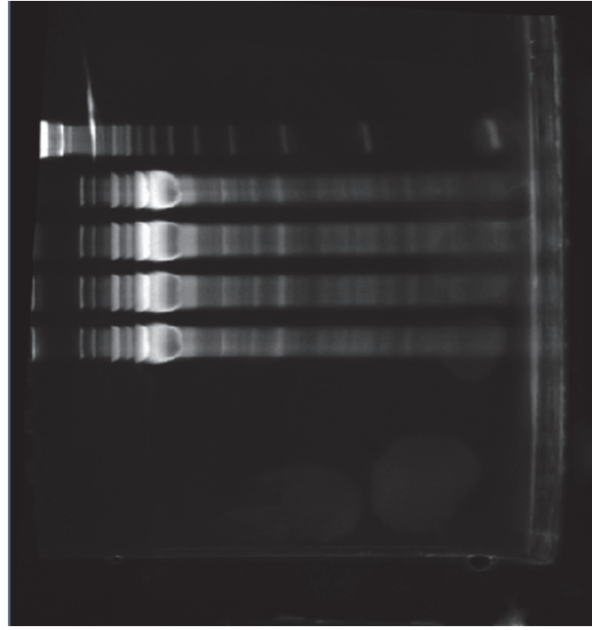

Figure 6S: Northern blot analysis of the indicated miR-203 mutants in transfected cells.  
Right panel is the longer exposure version.

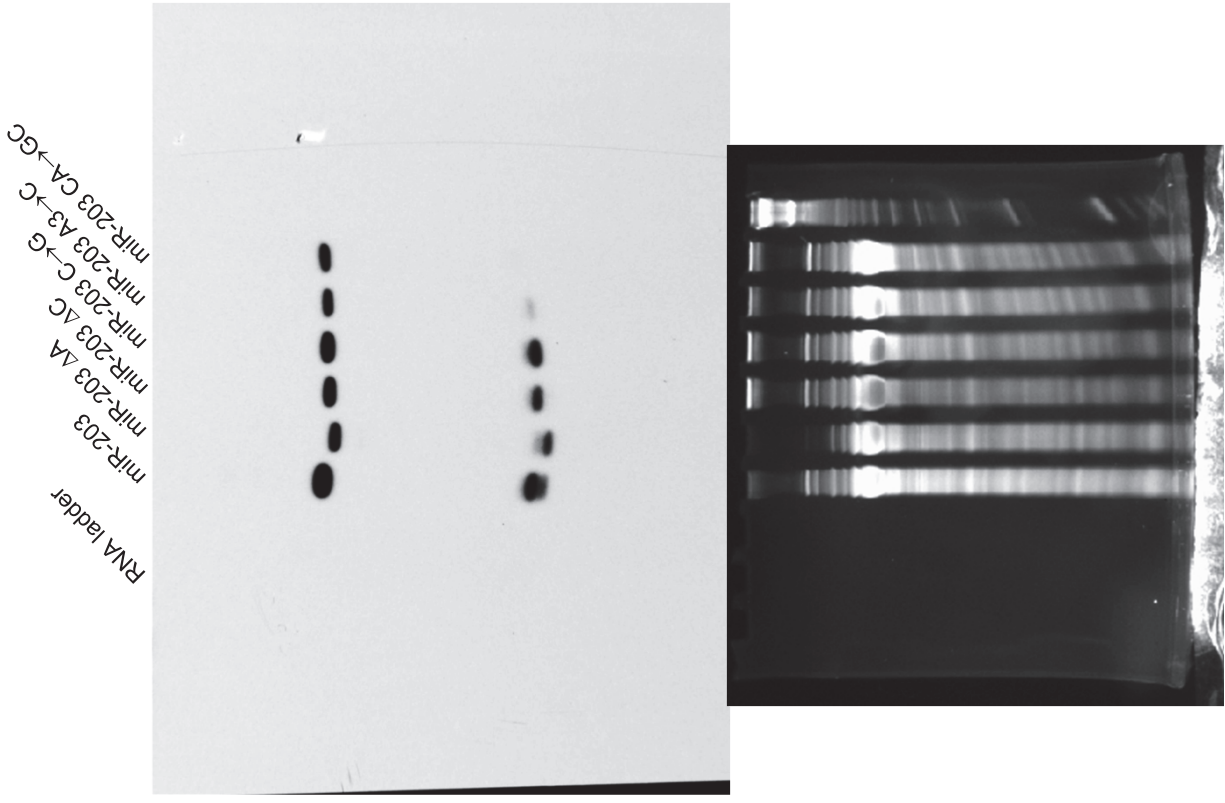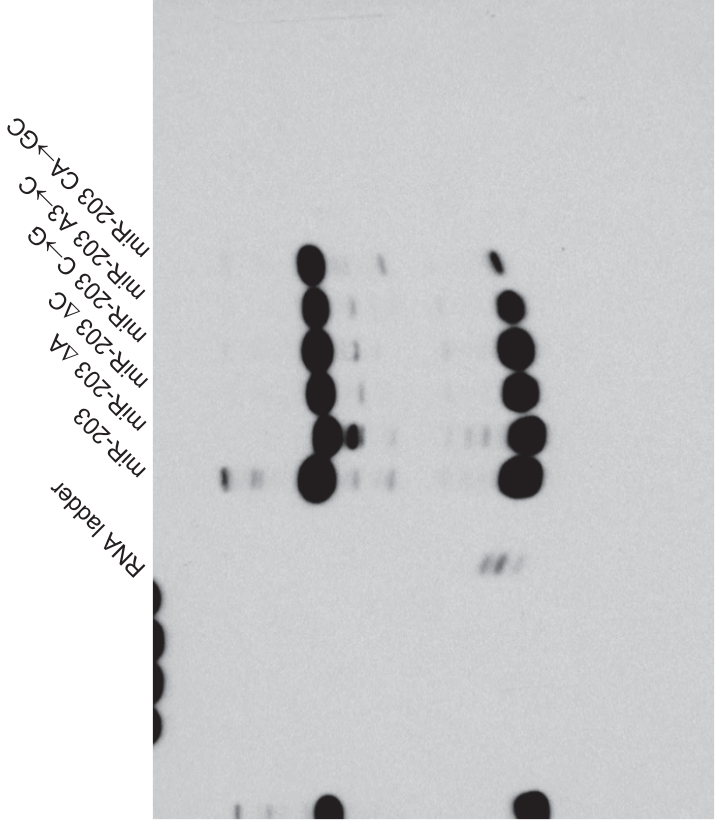

Figure 7S: Northern blot analysis of the indicated miR-203 mutants in transfected cells. Right panel is the longer exposure version.

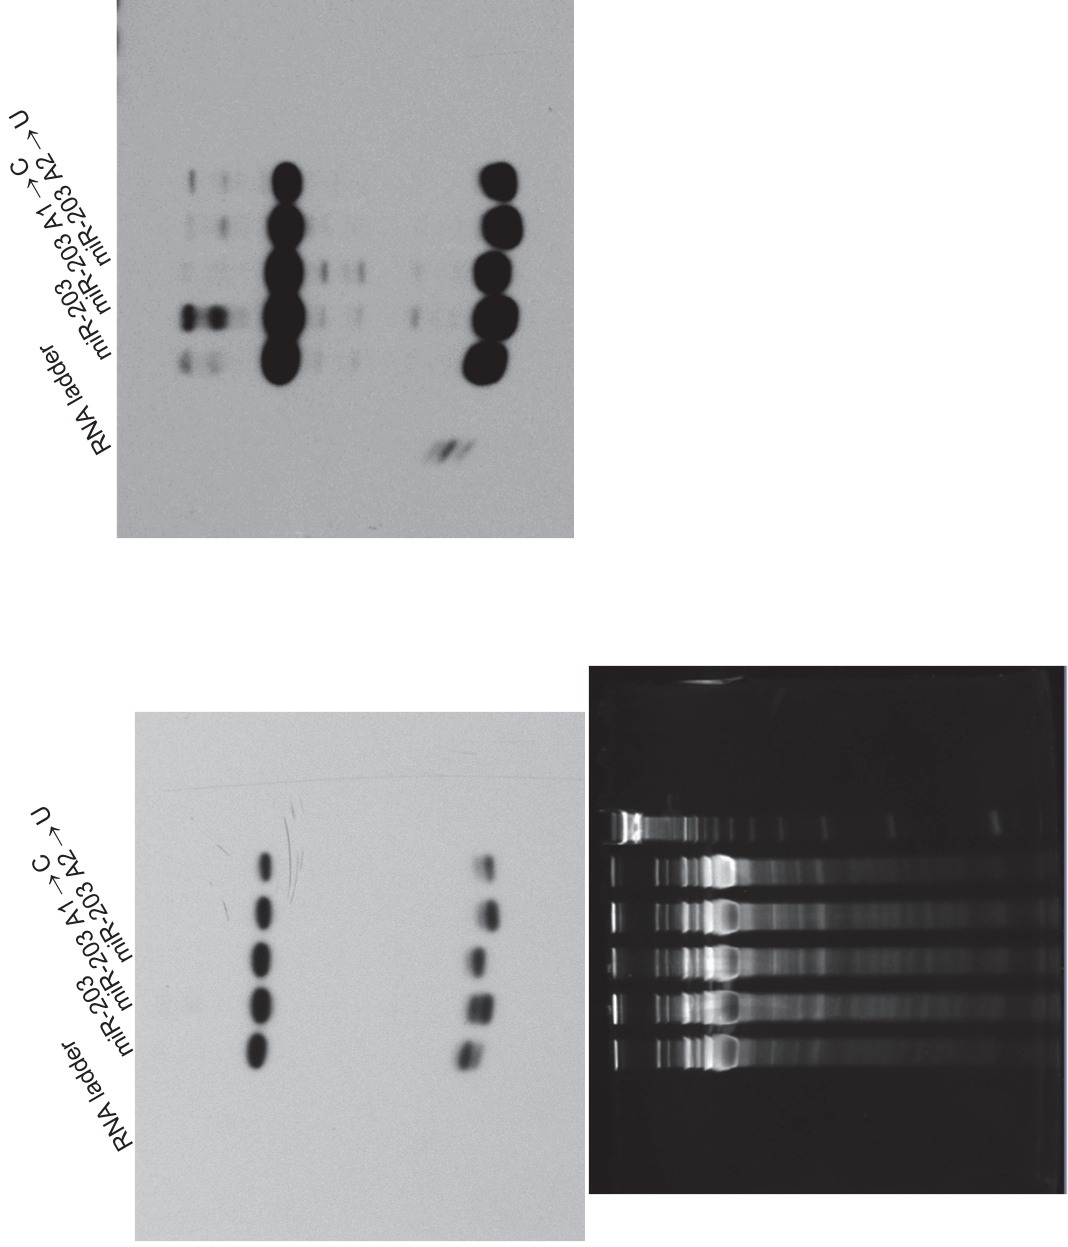

Figure 8S: Northern blot analysis of the indicated miR-203 mutants in transfected cells. Right panel is the longer exposure version.



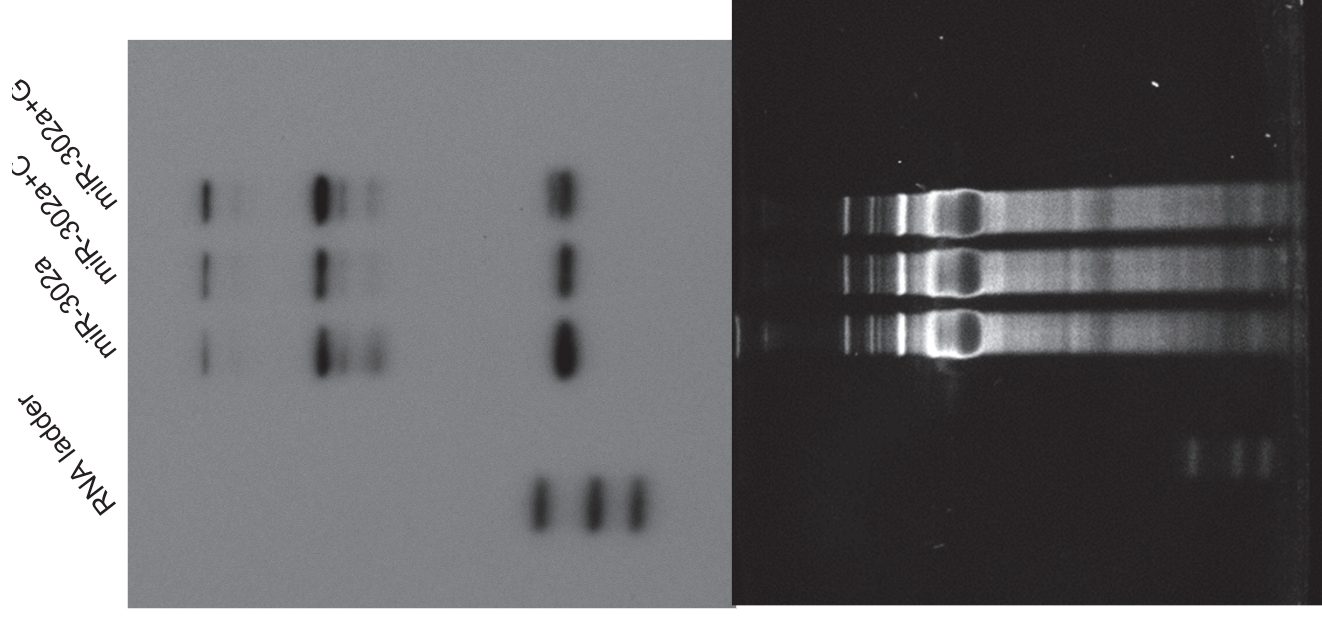

Figure 9S: Northern blot analysis of the indicated miR-302a and mutants in transfected cells.

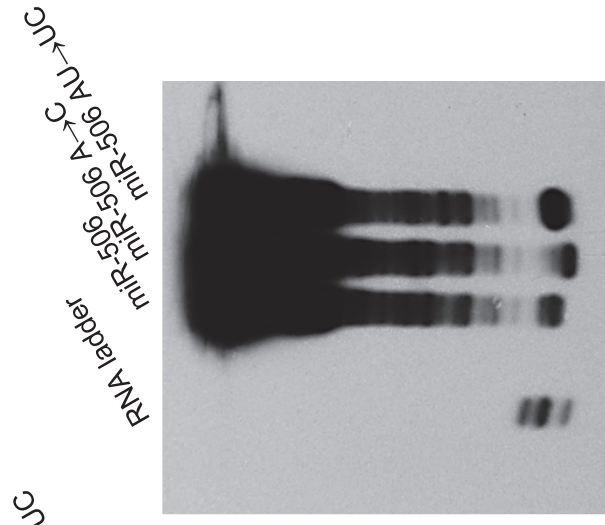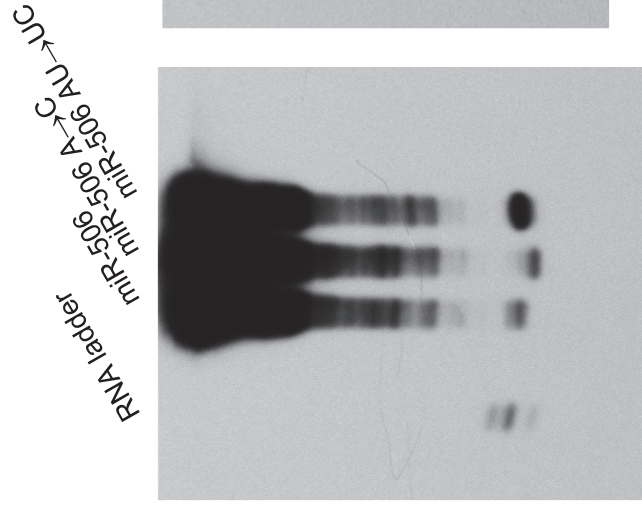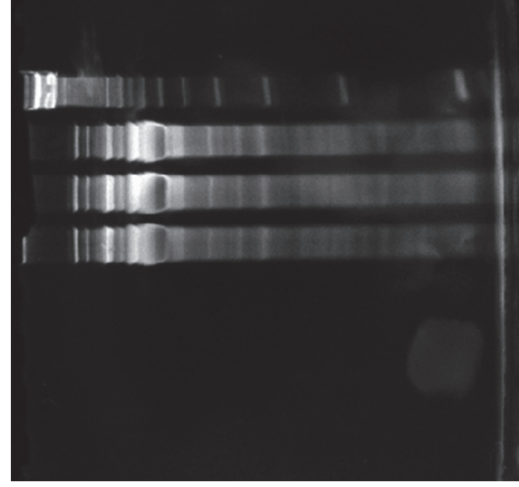

Figure 10S: Northern blot analysis of the indicated miR-506 and mutants in transfected cells. Right panel is the longer exposure version.

RNA ladder  
miR-203  
miR-203 AA  
miR-203 AC  
miR-203 C→G  
miR-203 A3→C  
miR-203 CA→GC

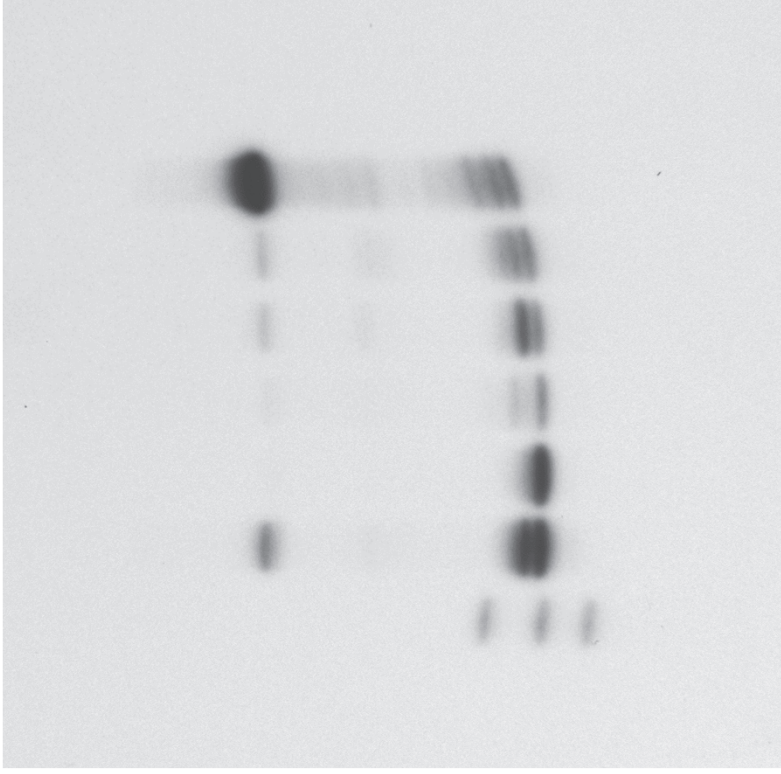

Figure 11S: Northern blot analysis of the indicated miR-203 mutants processed *in vitro*.

RNA ladder  
miR-203  
miR-203 A1 ← C  
miR-203 A2 → U

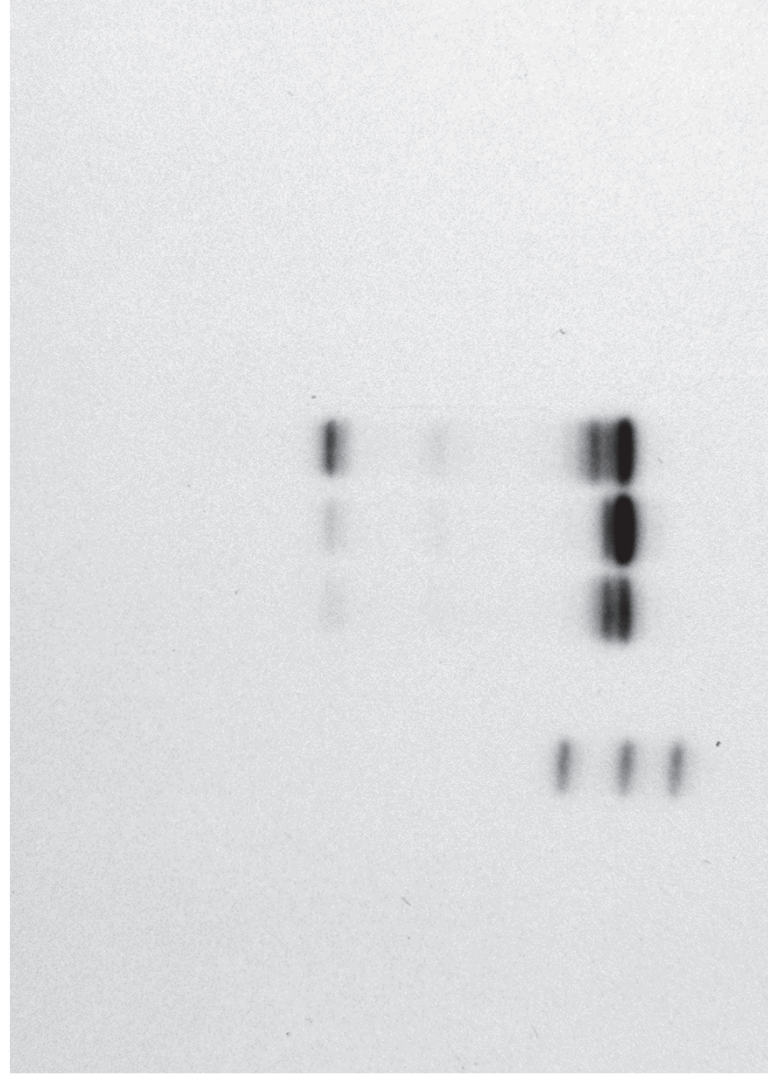

Figure 12S: Northern blot analysis of the indicated miR-203 mutants processed *in vitro*.
