# Supplementary material for: A sliding-bulge structure at the Dicer processing site of pre-miRNAs regulates alternative Dicer processing to generate 5′-isomiRs
Source: PubMed Central journal article supplement — Heliyon. 2016 Sep 1;2(9):e00148. doi: 10.1016/j.heliyon.2016.e00148 (PMC5021778; doi:10.1016/j.heliyon.2016.e00148), 2016-09-01
Supplement: mmc5.pdf [file mmc5.pdf]

**Table S1. The predominant small-RNA reads**

|                                                                                                                    | Reads  | %     |
|--------------------------------------------------------------------------------------------------------------------|--------|-------|
| <b>#Pri-miR-136</b>                                                                                                |        |       |
| ucaacgggugaugagagccucggaggACUCCAUUUGUUUGAUGAUGauucuaaagcuccAUCAUCGUCUCAAUAGUCUUcagaggguucaucaugucgucgguugg         |        |       |
| ...XXXXXXXXUGAUGAGCCUCGGA.....                                                                                     | 2421   | 29.2  |
| ...XXXXXXXXGAUGAGCCUCGGAGG.....                                                                                    | 5652   | 68.2  |
| .....ACUCCAUUUGUUUGAXXXXXXXXXX.....                                                                                | 623037 | 96.0  |
| .....CAUCAUCGUCUCAAUXXXXXXXXX.....                                                                                 | 30846  | 37.6  |
| .....AUCAUCGUCUCAAUGXXXXXXXXX.....                                                                                 | 38690  | 47.1  |
| .....UCAUCGUCUCAAUGAXXXXXXXXXX.....                                                                                | 9285   | 11.3  |
| .....UCAGAGGGUUCUAUCAAXXXXXXXXXX.....                                                                              | 154    | 91.1  |
| <b>#Pri-miR-140</b>                                                                                                |        |       |
| ggcgcgcccugugugucucucuguguccugcCAGUGGUUUUACCCUAUGGUAGguuacgucaugcugucUACCACAGGGUAGAACACCGAacaggauaccgggaccucugcugc |        |       |
| .....XXXXXXXXUCUCUCUGUGUCCUGC.....                                                                                 | 11705  | 94.7  |
| .....CAGUGGUUUUACCCXXXXXXXXXXXXX.....                                                                              | 128992 | 97.7  |
| .....UACCACAGGGUAGAAXXXXXXXXXXX.....                                                                               | 81350  | 54.3  |
| .....ACCACAGGGUAGAACCXXXXXXXXXX.....                                                                               | 63609  | 42.5  |
| .....AGGAUACCGGGGCACXXXXXXXXXX.....                                                                                | 909    | 87.2  |
| <b>#Pri-miR-323</b>                                                                                                |        |       |
| cuacugcugcugcuugguacuuggagagAGGUGGUCCGUGGCGGUUCGcucauuuauggcGCACAUUACACGGUCGACCUCUuugcgguaucauaucggccuugcg         |        |       |
| ...XXXXXXXXCUUGGUACUUGGAGAG.....                                                                                   | 2787   | 99.9  |
| .....AGGUGGUCCGUGGCGGUXXXXXX.....                                                                                  | 57     | 80.3  |
| .....GCACAUUACACGGUCGACXXXXXXXX.....                                                                               | 4856   | 14.6  |
| .....CACAUUACACGGUCGAXXXXXXXXX.....                                                                                | 26355  | 79.5  |
| .....UUGCGGUACUAAUCCXXXXXXXXXX.....                                                                                | 51     | 100.0 |
| <b>#Pri-miR-363</b>                                                                                                |        |       |
| augaaaugaacuguuugcuguuauCAGGUGGAACCGAUGCAUUUugguugguuaaagagagaaAAUUGCACGGUAUCCAUCUGUAaaccgcaggaccuauguggacag       |        |       |
| ..XXXXXXXXAACUGUUUUGCUGUUAU.....                                                                                   | 582    | 97.7  |
| .....CAGGUGGAACCGAUGCXXXXXXXXXX.....                                                                               | 6088   | 96.5  |
| .....AAUUGCACGGUAUCCAXXXXXXXXXX.....                                                                               | 45010  | 73.7  |
| .....AUUGCACGGUAUCCAUCXXXXXXXXX.....                                                                               | 14127  | 23.1  |
| .....AACCGCAGGACCUAUGUGGA...                                                                                       | 2      | 100.0 |
| <b>#pri-miR-383</b>                                                                                                |        |       |
| aaacuccacgucaccuguccucAGAUCAGAAGGUGACUGUGGCUuugggguggauuuuaucagCCACAGCACUGCCUGGUCAGAaagagcaaguguccuagccuuuac       |        |       |
| ..XXXXCCACGUCACCUGCUCCU.....                                                                                       | 369    | 43.4  |
| ..XXXXXCACGUCACCUGCUCCUC.....                                                                                      | 480    | 56.4  |
| .....CAGAUCAAGAAGGUGACXXXXXXXXXX.....                                                                              | 12366  | 39.7  |
| .....AGAUCAGAAGGUGACUXXXXXXXXX.....                                                                                | 18110  | 58.2  |
| .....CCACAGCACUGCCUGGUCAGXXX.....                                                                                  | 4202   | 83.3  |
| .....CACAGCACUGCCUGGUCAGXXX.....                                                                                   | 717    | 14.2  |
| .....AAGAGCAAGUGUCCUAGCXXXXXXXXX.....                                                                              | 348    | 18.9  |
| .....AGAGCAAGUGUCCUAGCXXXXXXXXX.....                                                                               | 966    | 52.5  |
| .....GAGCAAGUGUCCUAGCXXXXXXXXX.....                                                                                | 457    | 24.8  |
| <b>#Pri-miR-409</b>                                                                                                |        |       |
| ccgagccucuccgugguacucggagagAGGUUACCCGAGCAACUUUGCAUcuggagagacGAAUGUUGCUCGGUGAACCCUUuuucgguaucaaaucuccagggagcc       |        |       |
| .....XXCCGUGGUACUCGGAGAG.....                                                                                      | 90     | 100.0 |
| .....AGGUUACCCGAGCAACXXXXXXXXXX.....                                                                               | 1387   | 96.3  |
| .....CGAAUGUUGCUCGGUGXXXXXXXXXX.....                                                                               | 2705   | 24.5  |
| .....GAAUGUUGCUCGGUGAACXXXXXXXXX.....                                                                              | 6134   | 55.6  |

|                                                                                                                        |             |       |             |       |             |       |         |      |  |
|------------------------------------------------------------------------------------------------------------------------|-------------|-------|-------------|-------|-------------|-------|---------|------|--|
| .....AAUGUUGCUCGGUGAACCCXXXXXX.....                                                                                    | 1475        | 13.4  |             |       |             |       |         |      |  |
| .....UUUCGGUAUCAAUCCCUCCA.....                                                                                         | 12          | 100.0 |             |       |             |       |         |      |  |
| #Pri-miR-411                                                                                                           |             |       |             |       |             |       |         |      |  |
| ggcgucucugugugguacuuggagagaUAGUAGACCGUAUAGCGUACGcuuuauucugugacgUAUGUAAACACGGUCCACUAACCcucaguaucuuuaucccauucccgaggccccc | Reads       | %     |             |       |             |       |         |      |  |
| ..XXXXXXXXXGUGGUACUUGGAGAGA.....                                                                                       | 3478        | 63.0  |             |       |             |       |         |      |  |
| ..XXXXXXXXXUGGUACUUGGAGAGAU.....                                                                                       | 1689        | 30.6  |             |       |             |       |         |      |  |
| .....AUAGUAGACCGUAUAGXXXXXX.....                                                                                       | 55922       | 42.3  |             |       |             |       |         |      |  |
| .....UAGUAGACCGUAUAGCXXXXXXXXXXXX.....                                                                                 | 72577       | 54.9  |             |       |             |       |         |      |  |
| .....UAUGUAAACACGGUCCAXXXXXXX.....                                                                                     | 143197      | 95.0  |             |       |             |       |         |      |  |
| .....CCUCAGUAUCAAUCCAUCCX.....                                                                                         | 21          | 33.3  |             |       |             |       |         |      |  |
| .....CCUCAGUAUCAAUCCAUXXXXXXXXXXXXXX.....                                                                              | 33          | 52.4  |             |       |             |       |         |      |  |
| .....CUCAGUAUCAAUCCAUCCXXXXXX.....                                                                                     | 5           | 7.9   |             |       |             |       |         |      |  |
| #miR-203                                                                                                               | repliacte 1 |       | repliacte 2 |       | repliacte 3 |       | %       |      |  |
| uucugugucaggcgccgucgucAGUGGUUCUUGACAGUUAACAAGuucugugacacaaauGUGAAAUGUUUAGGACCACUAGaccggcgcgacggcgggcgacga              | Reads       | %     | Reads       | %     | Reads       | %     | Average | Sd   |  |
| ..XXXXXXXXXGUGGUACUUGGAGAGA.....                                                                                       | 1263        | 99.7  | 1525        | 99.8  | 1098        | 99.8  | 99.8    | 0.08 |  |
| .....AGUGGUUCUUGACAGUUAACAAGUUCUGUAGCACAUAUUGGAAAUGUUUAGGACCACUAG.....                                                 | 1895        | 95.9  | 4921        | 96.7  | 2442        | 95.8  | 96.1    | 0.49 |  |
| .....AGUGGUUCUUGACAGUUAACAAGUUCUUGGAGAGAU.....                                                                         | 645         | 93.9  | 765         | 98.2  | 672         | 93.6  | 95.2    | 2.57 |  |
| .....GUGAAAUGUUUAGGACCXXXXXXXXXX.....                                                                                  | 6198        | 53.9  | 6561        | 49.9  | 5460        | 51.0  | 51.6    | 2.09 |  |
| .....UGAAAUGUUUAGGACCXXXXXXXXXX.....                                                                                   | 4580        | 39.8  | 5984        | 45.5  | 4628        | 43.2  | 42.8    | 2.84 |  |
| .....ACCGGCGCGCACGGCXXXXXX.....                                                                                        | 20          | 100.0 | 35          | 100.0 | 21          | 100.0 | 100.0   | 0.00 |  |
| #miR-203 U-A                                                                                                           | repliacte 1 |       | repliacte 2 |       | repliacte 3 |       | %       |      |  |
| uucugugucaggcgccgucgucAGUGGUUCUUGACAGUUAACAAGuucugugacacaaauGUGAAAUGUUUAGGACCACUAGaccggcgcgacggcgggcgacga              | Reads       | %     | Reads       | %     | Reads       | %     | Average | Sd   |  |
| XXXXXXXXXXGUGGUACUUGGAGAGA.....                                                                                        | 1794        | 99.4  | 817         | 99.8  | 1505        | 99.7  | 99.6    | 0.21 |  |
| .....AGUGGUUCUUGACAGUUAACAAGUUCUGUAGCACAUAUUGGAAAUGUUUAGGACCACUAG.....                                                 | 4297        | 94.4  | 5386        | 96.1  | 2568        | 92.1  | 94.2    | 2.01 |  |
| .....AGUGGUUCUUGACAGUUAACAAGUUCUUGGAGAGAU.....                                                                         | 918         | 94.6  | 901         | 96.4  | 980         | 96.7  | 95.9    | 1.14 |  |
| .....GUGAAAUGUUUAGGACCXXXXXXXXXX.....                                                                                  | 5464        | 50.3  | 6075        | 51.5  | 6605        | 49.8  | 50.5    | 0.87 |  |
| .....UGAAAUGUUUAGGACCXXXXXXXXXX.....                                                                                   | 4772        | 43.9  | 5172        | 43.9  | 6022        | 45.4  | 44.4    | 0.90 |  |
| .....ACCGGCGCGCACGGCXXXXXX.....                                                                                        | 35          | 100.0 | 13          | 100.0 | 18          | 100.0 | 100.0   | 0.00 |  |
| #miR-203 G-U                                                                                                           | repliacte 1 |       | repliacte 2 |       | repliacte 3 |       | %       |      |  |
| uucugugucaggcgccgucgucAGUGGUUCUUGACAUUUAACAAGuucugugacacaaauGUGAAAUGUUUAGGACCACUAGaccggcgcgacggcgggcgacga              | Reads       | %     | Reads       | %     | Reads       | %     | Average | Sd   |  |
| XXXXXXXXXXGUGGUACUUGGAGAGA.....                                                                                        | 1497        | 99.5  | 827         | 99.5  | 1426        | 99.7  | 99.6    | 0.12 |  |
| .....AGUGGUUCUUGACAUUUAACAAGUUCUGUAGCACAUAUUGGAAAUGUUUAGGACCACUAG.....                                                 | 3411        | 92.3  | 3868        | 93.7  | 4668        | 94.0  | 93.3    | 0.91 |  |
| .....AGUGGUUCUUGACAUUUAACAAGUUCUUGGAGAGAU.....                                                                         | 1335        | 95.8  | 1479        | 95.9  | 1466        | 94.8  | 95.5    | 0.61 |  |
| .....GUGAAAUGUUUAGGACCXXXXXXXXXX.....                                                                                  | 5579        | 49.6  | 5645        | 47.3  | 5803        | 49.3  | 48.8    | 1.23 |  |
| .....UGAAAUGUUUAGGACCXXXXXXXXXX.....                                                                                   | 4804        | 42.7  | 5530        | 46.4  | 5146        | 43.7  | 44.3    | 1.89 |  |
| .....ACCGGCGCGCACGGCXXXXXX.....                                                                                        | 32          | 100.0 | 2           | 100.0 | 14          | 100.0 | 100.0   | 0.00 |  |
| #miR-203 m0                                                                                                            | repliacte 1 |       | repliacte 2 |       | repliacte 3 |       | %       |      |  |
| uucugugucaggcgccgucgucAGUGGUUCUUGACAUUUAACAAGuucugugacacaaauGUGAAAUGUUUAGGACCACUAGaccggcgcgacggcgggcgacga              | Reads       | %     | Reads       | %     | Reads       | %     | Average | Sd   |  |
| XXXXXXXXXXGUGGUACUUGGAGAGA.....                                                                                        | 1324        | 99.7  | 1075        | 99.1  | 1805        | 99.4  | 99.4    | 0.30 |  |
| .....AGUGGUUCUUGACAUUUAACAAGUUCUGUAGCACAUAUUGGAAAUGUUUAGGACCACUAG.....                                                 | 2508        | 91.0  | 3623        | 92.5  | 3465        | 93.5  | 92.3    | 1.26 |  |
| .....AGUGGUUCUUGACAUUUAACAAGUUCUUGGAGAGAU.....                                                                         | 929         | 95.3  | 1475        | 95.9  | 1395        | 96.9  | 96.0    | 0.81 |  |
| .....GUGAAAUGUUUAGGACCXXXXXXXXXX.....                                                                                  | 4697        | 54.3  | 6442        | 52.8  | 5404        | 55.1  | 54.1    | 1.16 |  |
| .....UGAAAUGUUUAGGACCXXXXXXXXXX.....                                                                                   | 3129        | 36.2  | 4751        | 39.0  | 3470        | 35.4  | 36.8    | 1.88 |  |
| .....ACCGGCGCGCACGGCXXXXXX.....                                                                                        | 23          | 100.0 | 17          | 100.0 | 47          | 100.0 | 100.0   | 0.00 |  |
| #miR-203 ΔA                                                                                                            | repliacte 1 |       | repliacte 2 |       | repliacte 3 |       | %       |      |  |
| uucugugucaggcgccgucgucAGUGGUUCUUGACAGUUCACAGUucugugacacaaauGUGAAAUGUUUAGGACCACUAGaccggcgcgacggcgggcgacga               | Reads       | %     | Reads       | %     | Reads       | %     | Average | Sd   |  |
| XXXXXXXXXXGUGGUACUUGGAGAGA.....                                                                                        | 1111        | 100.0 | 784         | 100.0 | 549         | 99.6  | 99.9    | 0.23 |  |

|                                                                                                              |             |       |             |       |             |       |         |      |
|--------------------------------------------------------------------------------------------------------------|-------------|-------|-------------|-------|-------------|-------|---------|------|
| .....AGUGGUUCUUGACAGUUCACAGUUCUGUAGCACAAUUGUGAAAUGUUUAGGACCACUAG.....                                        | 2118        | 96.0  | 5349        | 97.8  | 316         | 94.9  | 96.2    | 1.46 |
| .....AGUGGUUCUUGACAGUXXXXXXXXXXXXX.....                                                                      | 4133        | 100.0 | 6661        | 98.6  | 1226        | 95.2  | 97.9    | 2.47 |
| .....GUGAAAUGUUUAGGACXXXXXXXXXX.....                                                                         | 773         | 6.8   | 947         | 6.4   | 321         | 5.6   | 6.3     | 0.61 |
| .....UGAAAUGUUUAGGACXXXXXXXXXX.....                                                                          | 9892        | 87.3  | 13338       | 90.2  | 5022        | 87.9  | 88.5    | 1.51 |
| .....ACCCGGCGCGCACGGCXXXXXXXXXX                                                                              | 34          | 94.0  | 15          | 100.0 | 17          | 100.0 | 98.0    | 3.48 |
| #miR-203 ΔC                                                                                                  | repliacte 1 |       | repliacte 2 |       | repliacte 3 |       | %       |      |
| uucugugugcaggcgcgccugguccAGUGGUUCUUGACAGUCAAAGUucuguagcacaauuGUGAAAUGUUUAGGACCACUAGaccggcgcgccaggcgcgacga    | Reads       | %     | Reads       | %     | Reads       | %     | Average | Sd   |
| XXXXXXXXXXCAGGCGCGCCUGGUCC.....                                                                              | 993         | 99.6  | 702         | 100.0 | 1304        | 99.4  | 99.7    | 0.31 |
| .....AGUGGUUCUUGACAGUUCACAGUUCUUGUAGCACAAUUGUGAAAUGUUUAGGACCACUAG.....                                       | 1956        | 97.2  | 2364        | 97.6  | 2142        | 95.4  | 96.7    | 1.17 |
| .....AGUGGUUCUUGACAGUXXXXXXXXXXXXX.....                                                                      | 229         | 88.4  | 415         | 92.4  | 333         | 88.8  | 89.9    | 2.20 |
| .....GUGAAAUGUUUAGGACXXXXXXXXXX.....                                                                         | 6546        | 83.1  | 7168        | 82.6  | 6824        | 81.4  | 82.4    | 0.86 |
| .....UGAAAUGUUUAGGACXXXXXXXXXX.....                                                                          | 746         | 9.5   | 876         | 10.1  | 914         | 10.9  | 10.2    | 0.72 |
| .....ACCCGGCGCGCACGGCXXXXXXXXXX                                                                              | 23          | 100.0 | 10          | 100.0 | 28          | 100.0 | 100.0   | 0.00 |
| #miR-203 C→G                                                                                                 | repliacte 1 |       | repliacte 2 |       | repliacte 3 |       | %       |      |
| uucugugugcaggcgcgccugguccAGUGGUUCUUGACAGUCAAAGUucuguagcacaauuGUGAAAUGUUUAGGACCACUAGaccggcgcgccaggcgcgacga    | Reads       | %     | Reads       | %     | Reads       | %     | Average | Sd   |
| XXXXXXXXXXCAGGCGCGCCUGGUCC.....                                                                              | 920         | 99.6  | 576         | 99.3  | 1437        | 99.9  | 99.6    | 0.30 |
| .....AGUGGUUCUUGACAGUUCACAGUUCUUGUAGCACAAUUGUGAAAUGUUUAGGACCACUAG.....                                       | 1355        | 94.9  | 2064        | 97.5  | 1702        | 95.9  | 96.1    | 1.31 |
| .....AGUGGUUCUUGACAGUXXXXXXXXXXXXX.....                                                                      | 627         | 94.7  | 492         | 91.1  | 540         | 95.4  | 93.7    | 2.31 |
| .....GUGAAAUGUUUAGGACXXXXXXXXXX.....                                                                         | 7282        | 93.9  | 5961        | 92.3  | 7608        | 94.2  | 93.5    | 1.01 |
| .....ACCCGGCGCGCACGGCXXXXXXXXXX                                                                              | 16          | 100.0 | 7           | 100.0 | 26          | 92.9  | 97.6    | 4.10 |
| #miR-203 A3→C                                                                                                | repliacte 1 |       | repliacte 2 |       | repliacte 3 |       | %       |      |
| uucugugugcaggcgcgccugguccAGUGGUUCUUGACAGUCAAACGUucuguagcacaauuGUGAAAUGUUUAGGACCACUAGaccggcgcgccaggcgcgacga   | Reads       | %     | Reads       | %     | Reads       | %     | Average | Sd   |
| XXXXXXXXXXCAGGCGCGCCUGGUCC.....                                                                              | 1079        | 99.8  | 586         | 100.0 | 1040        | 99.6  | 99.8    | 0.20 |
| .....AGUGGUUCUUGACAGUUCACAGUUCUUGUAGCACAAUUGUGAAAUGUUUAGGACCACUAG.....                                       | 2472        | 96.0  | 1732        | 96.1  | 1135        | 95.2  | 95.8    | 0.49 |
| .....AGUGGUUCUUGACAGUXXXXXXXXXXXXX.....                                                                      | 621         | 96.0  | 480         | 96.6  | 328         | 94.3  | 95.6    | 1.19 |
| .....GUGAAAUGUUUAGGACXXXXXXXXXX.....                                                                         | 4949        | 84.5  | 2901        | 84.0  | 3947        | 85.2  | 84.6    | 0.60 |
| .....UGAAAUGUUUAGGACXXXXXXXXXXXXX.....                                                                       | 531         | 9.1   | 290         | 8.4   | 328         | 7.1   | 8.2     | 1.01 |
| .....ACCCGGCGCGCACGGCXXXXXXXXXX                                                                              | 19          | 100.0 | 9           | 100.0 | 28          | 100.0 | 100.0   | 0.00 |
| #miR-203 CA→GC                                                                                               | repliacte 1 |       | repliacte 2 |       | repliacte 3 |       | %       |      |
| uucugugugcaggcgcgccugguccAGUGGUUCUUGACAGUCAAACGUucuguagcacaauuGUGAAAUGUUUAGGACCACUAGaccggcgcgccaggcgcgacga   | Reads       | %     | Reads       | %     | Reads       | %     | Average | Sd   |
| XXXXXXXXXXCAGGCGCGCCUGGUCC.....                                                                              | 722         | 99.4  | 598         | 99.3  | 997         | 99.7  | 99.5    | 0.21 |
| .....AGUGGUUCUUGACAGUUCACAGUUCUUGUAGCACAAUUGUGAAAUGUUUAGGACCACUAG.....                                       | 1723        | 95.8  | 1682        | 97.1  | 1284        | 95.0  | 96.0    | 1.06 |
| .....AGUGGUUCUUGACAGUUCXXXXXXXXXXXXX.....                                                                    | 360         | 88.5  | 355         | 86.8  | 302         | 85.1  | 86.8    | 1.70 |
| .....GUGAAAUGUUUAGGACXXXXXXXXXXXXX.....                                                                      | 683         | 80.4  | 753         | 79.3  | 756         | 80.3  | 80.0    | 0.61 |
| .....UGAAAUGUUUAGGACCACUXXXX.....                                                                            | 45          | 5.3   | 50          | 5.3   | 60          | 6.4   | 5.7     | 0.64 |
| .....ACCCGGCGCGCACGGCGGXXXXXXXXXX                                                                            | 13          | 100.0 | 4           | 100.0 | 16          | 100.0 | 100.0   | 0.00 |
| #miR-203 m AU                                                                                                | repliacte 1 |       | repliacte 2 |       | repliacte 3 |       | %       |      |
| uucugugugcaggcgcgccugguccAGUGGUUCUUGACAGUCAAACAGUucuguagcacaauuGUUGAAAUGUUUAGGACCACUAGaccggcgcgccaggcgcgacga | Reads       | %     | Reads       | %     | Reads       | %     | Average | Sd   |
| .....XXXXXXXXXAGGCGCGCCUGGUCC.....                                                                           | 580         | 99.7  | 1104        | 100.0 | 715         | 99.3  | 99.7    | 0.35 |
| .....AGUGGUUCUUGACAGUUCACAGUUCUUGUAGCACAAUUGUGAAAUGUUUAGGACCACUAG.....                                       | 497         | 93.6  | 322         | 92.5  | 723         | 94.0  | 93.4    | 0.78 |
| .....AGUGGUUCUUGACAGUUCAXXX.....                                                                             | 137         | 93.2  | 201         | 94.4  | 218         | 96.0  | 94.5    | 1.40 |
| .....UUGAAAUGUUUAGGACXXXXXXXXXXXXX.....                                                                      | 4045        | 91.2  | 8306        | 92.0  | 7983        | 93.9  | 92.4    | 1.39 |
| .....ACCCGGCGCGCACGGCGGCX.....                                                                               | 5           | 100.0 | 10          | 100.0 | 10          | 100.0 | 100.0   | 0.00 |
| #miR-203 mm AC                                                                                               | repliacte 1 |       | repliacte 2 |       | repliacte 3 |       | %       |      |
| uucugugugcaggcgcgccugguccAGUGGUUCUUGACAGUCAAACAGUucuguagcacaauuGCUGAAAUGUUUAGGACCACUAGaccggcgcgccaggcgcgacga | Reads       | %     | Reads       | %     | Reads       | %     | Average | Sd   |
| .....XXXXXXXXXAGGCGCGCCUGGUCC.....                                                                           | 978         | 99.4  | 893         | 100.0 | 644         | 100.0 | 99.8    | 0.35 |
| .....AGUGGUUCUUGACAGUXXXXXXXXXXXXX.....                                                                      | 372         | 93.7  | 355         | 92.2  | 181         | 95.3  | 93.7    | 1.55 |

|                                                                                                           |             |       |             |       |             |       |              |       |
|-----------------------------------------------------------------------------------------------------------|-------------|-------|-------------|-------|-------------|-------|--------------|-------|
| .....CUGAAAUGUUUAGGACXXXXXXXX.....                                                                        | 10797       | 95.1  | 9094        | 95.9  | 4358        | 97.0  | <b>96.0</b>  | 0.93  |
| .....ACCCGGCGCGCACGGCGGCXX..                                                                              | 12          | 100.0 | 10          | 100.0 | 12          | 100.0 | <b>100.0</b> | 0.00  |
| #miR-203 A1-C                                                                                             | repliacte 1 |       | repliacte 2 |       | repliacte 3 |       |              | %     |
| uuucugugucaggcgccgucgucAGUGGUUCUUGACAGUUCACAGuucuguagcacaauuGUGAAAUGUUUAGGACCACUAGaccgcgcgccacggcgccgacga | Reads       | %     | Reads       | %     | Reads       | %     | Average      | Sd    |
| ..XXXXXXXXXAGGCGCGCCUGGUCC.....                                                                           | 1074        | 99.5  | 1453        | 99.9  | 1427        | 99.5  | <b>99.6</b>  | 0.23  |
| .....AGUGGUUCUUGACAGUUCACAGUUCUGUAGCACAAUUGUGAAAUGUUUAGGACCACUAG.....                                     | 2447        | 95.3  | 3108        | 96.4  | 1140        | 93.8  | <b>95.2</b>  | 1.31  |
| .....AGUGGUUCUUGACAGUUCXXXXXXXXX.....                                                                     | 274         | 99.3  | 601         | 98.4  | 504         | 96.0  | 97.9         | 1.71  |
| .....GUGAAAUGUUUAGGACXXXXXXXXX.....                                                                       | 693         | 8.8   | 1048        | 7.5   | 1066        | 7.8   | <b>8.0</b>   | 0.68  |
| .....UGAAAUGUUUAGGACXXXXXXXXX.....                                                                        | 6337        | 80.7  | 12132       | 86.4  | 11505       | 84.5  | <b>83.9</b>  | 2.90  |
| .....ACCCGGCGCGCACGGCGGCXX..                                                                              | 13          | 100.0 | 12          | 100.0 | 31          | 100.0 | <b>100.0</b> | 0.00  |
| #miR-203 A2-U                                                                                             | repliacte 1 |       | repliacte 2 |       | repliacte 3 |       |              | %     |
| uuucugugucaggcgccgucgucAGUGGUUCUUGACAGUUCACAGuucuguagcacaauuGUGAAAUGUUUAGGACCACUAGaccgcgcgccacggcgccgacga | Reads       | %     | Reads       | %     | Reads       | %     | Average      | Sd    |
| ..XXXXXXXXXAGGCGCGCCUGGUCC.....                                                                           | 1089        | 99.8  | 1075        | 99.6  | 1637        | 99.9  | <b>99.8</b>  | 0.15  |
| .....AGUGGUUCUUGACAGUUCACAGUUCUGUAGCACAAUUGUGAAAUGUUUAGGACCACUAG.....                                     | 4792        | 98.3  | 2775        | 96.6  | 1619        | 95.1  | <b>96.7</b>  | 1.60  |
| .....AGUGGUUCUUGACAGUUCXXXXXXXXX.....                                                                     | 273         | 98.2  | 272         | 94.4  | 344         | 96.6  | 96.4         | 1.91  |
| .....GUGAAAUGUUUAGGACXXXXXXXXX.....                                                                       | 8305        | 89.3  | 10710       | 90.2  | 11180       | 90.9  | <b>90.1</b>  | 0.80  |
| .....ACCCGGCGCGCACGGCGGCXX..                                                                              | 18          | 100.0 | 9           | 100.0 | 31          | 100.0 | <b>100.0</b> | 0.00  |
| #miR-302a                                                                                                 | repliacte 1 |       | repliacte 2 |       | repliacte 3 |       |              | %     |
| uuuccaagacugggcuccccaccACUUAACGUGGAUGUACUUGCUuugaaacuaaagaagUAAGUGCUUCCAUGUUUUGGUGAugguaagucuuuuuac       | Reads       | %     | Reads       | %     | Reads       | %     | Average      | Sd    |
| ..XXXGACUGGGCUCGCCACC.....                                                                                | 29          | 100.0 | 19          | 100.0 | 24          | 92.3  | <b>97.4</b>  | 4.45  |
| .....GACUGGGCUCGCCACCACU.....                                                                             | 0           | 0.0   | 0           |       | 2           | 7.7   | <b>3.9</b>   | 5.44  |
| .....ACUUAACGUGGAUGUACUUGCUUUGAAACUAAAGAAGUAAGUGCUUCCAUGUUUUGGUGA.....                                    | 870         | 86.2  | 1032        | 79.0  | 877         | 85.4  | <b>83.5</b>  | 3.95  |
| .....UAAACGUGGAUGUACUUGCUUUGAAACUAAAGAAGUAAGUGCUUCCAUGUUUUGG.....                                         | 71          | 7.0   | 192         | 14.7  | 89          | 8.7   | <b>10.1</b>  | 4.05  |
| .....ACUUAACGUGGAUGUACUUGGXX.....                                                                         | 153         | 13.8  | 153         | 12.4  | 105         | 12.4  | 12.9         | 0.81  |
| .....UAAACGUGGAUGUACUUXXXXXXXXXX.....                                                                     | 838         | 75.4  | 963         | 78.0  | 699         | 82.3  | 78.6         | 3.48  |
| .....UAAGUGCUUCCAUGUUUUGGUGA.....                                                                         | 3645        | 86.6  | 4784        | 87.7  | 3948        | 86.9  | <b>87.1</b>  | 0.61  |
| .....AAGUGCUUCCAUGUUUUGGUGA.....                                                                          | 339         | 8.1   | 402         | 7.4   | 327         | 7.2   | <b>7.5</b>   | 0.45  |
| #miR-302a+C                                                                                               | repliacte 1 |       | repliacte 2 |       | repliacte 3 |       |              | %     |
| uuuccaagacugggcuccccaccACUUAACGUGGAUGUACUUGCUuugaaacuaaagaagUAAGUGCUUCCAUGUUUUGGUGAugguaagucuuuuuac       | Reads       | %     | Reads       | %     | Reads       | %     | Average      | Sd    |
| ..XXXGACUGGGCUCGCCACC.....                                                                                | 14          | 56.0  | 9           | 64.3  | 5           | 31.2  | <b>50.5</b>  | 17.22 |
| .....XCUGGGCUCGCCACCACU.....                                                                              | 11          | 44.0  | 5           | 35.7  | 11          | 68.7  | <b>49.5</b>  | 17.17 |
| .....ACUUAACGUGGAUGUACUUGCUUUGAAACUAAAGAAGUAAGUGCUUCCAUGUUUUGGUGA.....                                    | 816         | 86.9  | 470         | 83.5  | 607         | 75.6  | <b>82.0</b>  | 5.80  |
| .....UAAACGUGGAUGUACUUGCUUUGAAACUAAAGAAGUAAGUGCUUCCAUGUUUUGG.....                                         | 61          | 6.5   | 61          | 10.8  | 158         | 19.7  | <b>12.3</b>  | 6.73  |
| .....ACUUAACGUGGAUGUACUUXXXXXXXXXX.....                                                                   | 94          | 11.4  | 61          | 0.1   | 56          | 9.6   | 7.0          | 6.06  |
| .....UAAACGUGGAUGUACUUXXXXXXXXXX.....                                                                     | 665         | 80.6  | 443         | 0.8   | 503         | 85.8  | 55.7         | 47.64 |
| .....UAAGUGCUUCCAUGUUUUGGUGA.....                                                                         | 2902        | 88.5  | 1812        | 87.4  | 2192        | 90.4  | <b>88.8</b>  | 1.51  |
| .....AAGUGCUUCCAUGUUUUGGUGA.....                                                                          | 105         | 3.2   | 67          | 3.2   | 57          | 2.3   | <b>2.9</b>   | 0.50  |
| #miR-302a+G                                                                                               | repliacte 1 |       | repliacte 2 |       | repliacte 3 |       |              | %     |
| uuuccaagacugggcuccccaccACUUAACGUGGAUGUACUUGCUuugaaacuaaagaagUAAGUGCUUCCAUGUUUUGGUGAugguaagucuuuuuac       | Reads       | %     | Reads       | %     | Reads       | %     | Average      | Sd    |
| ..XXXGACUGGGCUCGCCACC.....                                                                                | 26          | 55.3  | 27          | 44.2  | 22          | 43.1  | <b>47.5</b>  | 6.75  |
| .....XCUGGGCUCGCCACCACU.....                                                                              | 21          | 44.7  | 32          | 52.5  | 29          | 56.9  | <b>51.4</b>  | 6.18  |
| .....ACUUAACGUGGAUGUACUUGCUUUGAAACUAAAGAAGUAAGUGCUUCCAUGUUUUGGUGA.....                                    | 969         | 79.0  | 967         | 85.0  | 829         | 74.2  | <b>79.4</b>  | 5.41  |
| .....UAAACGUGGAUGUACUUGCUUUGAAACUAAAGAAGUAAGUGCUUCCAUGUUUUGG.....                                         | 176         | 14.3  | 114         | 10.0  | 229         | 20.5  | <b>14.9</b>  | 5.28  |
| .....ACUUAACGUGGAUGUACUUGGXX.....                                                                         | 97          | 8.6   | 52          | 8.3   | 84          | 9.7   | <b>8.9</b>   | 0.74  |
| .....UAAACGUGGAUGUACUUXXXXXXXXXX.....                                                                     | 989         | 87.3  | 496         | 79.4  | 680         | 78.3  | <b>81.7</b>  | 4.91  |
| .....GUAAGUGCUUCCAUGUXXXXXXXXX.....                                                                       | 1081        | 30.3  | 655         | 26.1  | 978         | 29.2  | <b>28.6</b>  | 2.19  |
| .....UAAGUGCUUCCAUGUUUUGGUGA.....                                                                         | 2098        | 58.9  | 1552        | 61.9  | 1900        | 56.8  | <b>59.2</b>  | 2.57  |
| .....AAGUGCUUCCAUGUUUUGGUGA.....                                                                          | 185         | 5.2   | 145         | 5.8   | 232         | 6.9   | <b>6.0</b>   | 0.88  |

| #miR-506                                                                                               | repliacte 1 |       | repliacte 2 |       | repliacte 3 |       | %       |       |
|--------------------------------------------------------------------------------------------------------|-------------|-------|-------------|-------|-------------|-------|---------|-------|
| ucagccaauacuauguguagugccuUAUUCAGGAAGGUGUACUUAuagauuaauuuugUAAGGCACCCUUCUGAGUAGauaaugugcaacauggacaacau  | Reads       | %     | Reads       | %     | Reads       | %     | Average | Sd    |
| XXXXXXXXXACUAUGUGUAGUGCCU.....                                                                         | 10          | 58.8  | 8           | 80.0  | 7           | 100.0 | 79.6    | 20.60 |
| .....UAUUCAGGAAGGUGUACUUAUAGAUUAUAUUUGUAAGGCACCCUUCUGAGUAGA.....                                       | 191         | 99.0  | 193         | 98.0  | 120         | 100.0 | 99.0    | 1.00  |
| .....UAUUCAGGAAGGUGUXXXXXXXXXXXXX.....                                                                 | 324         | 89.0  | 369         | 92.7  | 237         | 92.9  | 91.5    | 2.20  |
| .....UGUAAGGCACCCUUCXXXXXXXXXX.....                                                                    | 306         | 29.1  | 264         | 28.1  | 231         | 26.1  | 27.8    | 1.52  |
| .....GUAAGGCACCCUUCGXXXXXXXXXXXXX.....                                                                 | 693         | 65.9  | 622         | 66.2  | 604         | 68.2  | 66.8    | 1.29  |
| #miR-506 A→C                                                                                           | repliacte 1 |       | repliacte 2 |       | repliacte 3 |       | %       |       |
| ucagccaauacuauguguagugccuUAUUCAGGAAGGUGUACUUAuagauuaauuuugUAAGGCACCCUUCUGAGUAGauaaugugcaacauggacaacau  | Reads       | %     | Reads       | %     | Reads       | %     | Average | Sd    |
| ...XCAUACUAUGUGUAGUGCCU.....                                                                           | 4           | 100.0 | 4           | 100.0 | 3           | 100.0 | 100.0   | 0.00  |
| .....UAUUCAGGAAGGUGUACUUAUAGAUUAUAUUUGUAAGGCACCCUUCUGAGUAGA.....                                       | 66          | 100.0 | 128         | 100.0 | 103         | 100.0 | 100.0   | 0.00  |
| .....UAUUCAGGAAGGUGUACUXXXXX.....                                                                      | 148         | 89.2  | 187         | 88.2  | 152         | 98.1  | 91.8    | 5.45  |
| .....UAAGGCACCCUUCGAGXXXXXXXXXX.....                                                                   | 797         | 95.0  | 1292        | 96.0  | 1584        | 96.3  | 95.8    | 0.68  |
| #miR-506 AU→UC                                                                                         | repliacte 1 |       | repliacte 2 |       | repliacte 3 |       | %       |       |
| ucagccaauacuauguguagugccuUAUUCAGGAAGGUGUACUUAUCagauuaauuuugUAAGGCACCCUUCUGAGUAGauaaugugcaacauggacaacau | Reads       | %     | Reads       | %     | Reads       | %     | Average | Sd    |
| XXXXXXXXXAUACUAUGUGUAGUGCCU.....                                                                       | 41          | 93.2  | 55          | 88.7  | 28          | 100.0 | 94.0    | 5.69  |
| .....UAUUCAGGAAGGUGUACUUAUCAGAUUAUAUUUGUAAGGCACCCUUCUGAGUAGA.....                                      | 1156        | 98.5  | 1421        | 98.3  | 694         | 98.2  | 98.3    | 0.15  |
| .....UAUUCAGGAAGGUGUUAUXXXXXXXXXX.....                                                                 | 858         | 93.3  | 912         | 91.7  | 722         | 92.0  | 92.3    | 0.85  |
| .....GUAAGGCACCCUUCGAXXXXXXXXXX.....                                                                   | 3356        | 85.0  | 3950        | 86.6  | 3657        | 87.6  | 86.4    | 1.31  |
| .....UAAGGCACCCUUCUGAGUXXXXX.....                                                                      | 434         | 11.0  | 470         | 10.3  | 375         | 9.0   | 10.1    | 1.02  |

The predominant small-RNA reads. Representative reads of cloned small RNAs are shown. Reads with the same ends were merged. "X" indicates the positions at which these reads might end. The raw small-RNA data for lengths of ~22 nt are found in Datasets S1 and S2 and small-RNA data for lengths in the pre-miRNA range are found in Dataset S3. moR reads are highlighted in blue. Pre-miRNA reads are highlighted in Red.
