# Supplementary material for: A sliding-bulge structure at the Dicer processing site of pre-miRNAs regulates alternative Dicer processing to generate 5′-isomiRs
Source: PubMed Central journal article supplement — Heliyon. 2016 Sep 1;2(9):e00148. doi: 10.1016/j.heliyon.2016.e00148 (PMC5021778; doi:10.1016/j.heliyon.2016.e00148), 2016-09-01
Supplement: mmc6.pdf [file mmc6.pdf]

**Table S2 The predominant mature miRNA reads cloned from miR-203 and its mutants**

|                         | length | #miR-203 |        |        | #miR-203 U→A |        |        | #miR-203 G→U |        |        | #miR-203 m0 |        |        |
|-------------------------|--------|----------|--------|--------|--------------|--------|--------|--------------|--------|--------|-------------|--------|--------|
|                         |        | Rep. 1   | Rep. 2 | Rep. 3 | Rep. 1       | Rep. 2 | Rep. 3 | Rep. 1       | Rep. 2 | Rep. 3 | Rep. 1      | Rep. 2 | Rep. 3 |
| GUGAAAUGUUUAGGACCACUAG  | 22nt   | 5751     | 6090   | 5095   | 5012         | 5625   | 6125   | 5045         | 5120   | 5265   | 4242        | 5859   | 4947   |
| GUGAAAUGUUUAGGACCACUAGu | 23nt   | 497      | 518    | 429    | 384          | 523    | 509    | 692          | 793    | 765    | 580         | 816    | 706    |
| UGAAAUGUUUAGGACCACUAG   | 21nt   | 4248     | 5600   | 4329   | 4305         | 4703   | 5456   | 4334         | 5098   | 4724   | 2675        | 4251   | 3035   |
| UGAAAUGUUUAGGACCACUAGu  | 22nt   | 1129     | 1278   | 1280   | 2245         | 3119   | 2662   | 1392         | 1735   | 1471   | 2004        | 3040   | 2106   |

The predominant mature miRNA reads cloned from miR-203 and its mutants. The experiment was repeated three times. The untemplated addition of U is indicated in lower case letters. The raw data are found in Dataset S1.
