# Supplementary material for: A sliding-bulge structure at the Dicer processing site of pre-miRNAs regulates alternative Dicer processing to generate 5′-isomiRs
Source: PubMed Central journal article supplement — Heliyon. 2016 Sep 1;2(9):e00148. doi: 10.1016/j.heliyon.2016.e00148 (PMC5021778; doi:10.1016/j.heliyon.2016.e00148), 2016-09-01
Supplement: mmc7.pdf [file mmc7.pdf]

**Table S3 Sequences of probes for northern blotting and primers for amplify pre-miRNAs of miR-203 and its mutants**

|                    |                                                                                                                                                  |
|--------------------|--------------------------------------------------------------------------------------------------------------------------------------------------|
| #Pri-miR-136       | aactcaacggtgttgatgagcctcggaggACTCCATTGTTTTGATGATGGattcttaagctccATCATCGTCTCAAATGAGTCTTeagagggttctatcat<br>gtcgtcggttgggttttttc                    |
| #Pri-miR-140       | aacggcgcgcctgtgtgtctctctctgtgtcctgcCAGTGGTTTACCCATAGGTAGgttaagctatgctgttctACCACAGGGTAGAACCCAGGAcagg<br>ataccggggcacctctgctgcgatttttttc           |
| #Pri-miR-203       | aacttctgtgtgcaggcgcctgttccAGTGGTCTTTGACAGTTCAACAgttctgtagcacaattGTGAAATGTTTAGGACCACTAGaccggcgcgcaagg<br>ggcgacgatttttttc                         |
| #Pri-miR-323       | aacctactgctgctgttggacttggagagAGGTGGTCCGTGGCGCCTTCGcttcaattatggcGCACATTACACGGTCGACCTCTttgcggtatctaacc<br>gccttgcgatttttttc                        |
| #Pri-miR-363       | aacatgaaatgaactgttttctgttatCAGGTGGAACACGATGCAATTTtggttggtgtaataggaggaaaATTGCACGGTATCCATCTGTAAaccgcaggac<br>ctatgtggacagtttttttc                  |
| #pri-miR-383       | aacaaactccacgtcacctgctcctCAGATCAGAAGGTGACGTGGCTtttgggtggatattaatcagCCACAGCACTCCTGGTCAGAaagagcaagtgtcct<br>gccttttaacttttttc                      |
| #Pri-miR-409       | aaccggagcctctcctgtgtactcggagagAGGTACCCGAGCAACTTTGCATctggaggacGAATTTGCTCGGTGAACCCCTtttccggtatcaaatccctc<br>agggagccttttttc                        |
| #Pri-miR-411       | aacggcgtctctgtgtgtacttggagagATAGTAGACCGTATAGCGTACGcttctctgtgacgtATGTAAACACGGTCCACAAACctcagtatcaaatcaat<br>ccccgagggcccttttttc                    |
| #miR-203 U→A       | aacttctgtgtgcaggcgcctgttccAGTGGTCTTAGACAGTTCAACAGTtctgtagcacaattGTGAAATGTTTAGGACCACTAGaccggcgcgcaagg<br>ggcgacgatttttttc                         |
| #miR-203 G→U       | aacttctgtgtgcaggcgcctgttccAGTGGTCTTAGACAGTTCAACAGTtctgtagcacaattGTGAAATGTTTAGGACCACTAGaccggcgcgcaagg<br>ggcgacgatttttttc                         |
| #miR-203 m0        | aacttctgtgtgcaggcgcctgttccAGTGGTCTTAGACAGTTCAACAGTtctgtagcacaattGTGAAATGTTTAGGACCACTAGaccggcgcgcaagg<br>ggcgacgatttttttc                         |
| #miR-203 ΔA        | aacttctgtgtgcaggcgcctgttccAGTGGTCTTAGACAGTTCAACAGTtctgtagcacaattGTGAAATGTTTAGGACCACTAGaccggcgcgcaagg<br>ggcgacgatttttttc                         |
| #miR-203 ΔC        | aacttctgtgtgcaggcgcctgttccAGTGGTCTTAGACAGTTCAAGATtctgtagcacaattGTGAAATGTTTAGGACCACTAGaccggcgcgcaagg<br>ggcgacgatttttttc                          |
| #miR-203 C→G       | aacttctgtgtgcaggcgcctgttccAGTGGTCTTAGACAGTTCAACAGTtctgtagcacaattGTGAAATGTTTAGGACCACTAGaccggcgcgcaagg<br>ggcgacgatttttttc                         |
| #miR-203 A3→C      | aacttctgtgtgcaggcgcctgttccAGTGGTCTTAGACAGTTCAACCGTtctgtagcacaattGTGAAATGTTTAGGACCACTAGaccggcgcgcaagg<br>ggcgacgatttttttc                         |
| #miR-203 CA→GC     | aacttctgtgtgcaggcgcctgttccAGTGGTCTTAGACAGTTCAACAGTtctgtagcacaattGTGAAATGTTTAGGACCACTAGaccggcgcgcaagg<br>ggcgacgatttttttc                         |
| #pri-203_m_AU      | aacttctgtgtgcaggcgcctgttccAGTGGTCTTAGACAGTTCAACAGTtctgtagcacaattGTGAAATGTTTAGGACCACTAGaccggcgcgcaagg<br>cgcgacgatttttttc                         |
| #pri-203_m_UA      | aacttctgtgtgcaggcgcctgttccAGTGGTCTTAGACAGTTCAACAGTtctgtagcacaattGTGAAATGTTTAGGACCACTAGaccggcgcgcaagg<br>cgcgacgatttttttc                         |
| #pri-203_m_GC      | aacttctgtgtgcaggcgcctgttccAGTGGTCTTAGACAGTTCAACAGTtctgtagcacaattGTGAAATGTTTAGGACCACTAGaccggcgcgcaagg<br>cgcgacgatttttttc                         |
| #pri-203_m_CG      | aacttctgtgtgcaggcgcctgttccAGTGGTCTTAGACAGTTCAACAGTtctgtagcacaattGTGAAATGTTTAGGACCACTAGaccggcgcgcaagg<br>ggcgacgatttttttc                         |
| #pri-203_mm_AA     | aacttctgtgtgcaggcgcctgttccAGTGGTCTTAGACAGTTCAACAGTtctgtagcacaattGTGAAATGTTTAGGACCACTAGaccggcgcgcaagg<br>cgcgacgatttttttc                         |
| #pri-203_mm_AC     | aacttctgtgtgcaggcgcctgttccAGTGGTCTTAGACAGTTCAACAGTtctgtagcacaattGTGAAATGTTTAGGACCACTAGaccggcgcgcaagg<br>cgcgacgatttttttc                         |
| #pri-302a          | aactaaaggattctaacttCttccaagactgggctcccCACCACTTAAACGTGGATGTACTTGCCTTTGAAACTAAAGAAGTAAGTGCCTCCATGTTTTGGTGA<br>GGtaagtcttccctttacattCttattattttttc  |
| #pri-302a+C        | aactaaaggattctaacttCttccaagactgggctcccCACCACTTAAACGTGGATGTACTTGCCTTTGAAACTAAAGAAGTAAGTGCCTCCATGTTTTGGTGA<br>TGGtaagtcttccctttacattCttattattttttc |
| #pri-302a+G        | aactaaaggattctaacttCttccaagactgggctcccCACCACTTAAACGTGGATGTACTTGCCTTTGAAACTAAAGAAGTAAGTGCCTCCATGTTTTGGTGA<br>TGGtaagtcttccctttacattCttattattttttc |
| #miR-203 A1→C      | aacttctgtgtgcaggcgcctgttccAGTGGTCTTAGACAGTTCCACAGTtctgtagcacaattGTGAAATGTTTAGGACCACTAGaccggcgcgcaagg<br>ggcgacgatttttttc                         |
| #miR-203 A2→U      | aacttctgtgtgcaggcgcctgttccAGTGGTCTTAGACAGTTCCACAGTtctgtagcacaattGTGAAATGTTTAGGACCACTAGaccggcgcgcaagg<br>ggcgacgatttttttc                         |
| #hsa-miR-506       | aactcagccatactatgtgtagtgcctTATTCAGGAAGGTGTACTTCAtagattaatatttgTAAGGCACCCCTCTGAGTAGAgtaatgtgcaacatggacaa<br>catttttttc                            |
| #hsa-miR-506 A→C   | aactcagccatactatgtgtagtgcctTATTCAGGAAGGTGTACTTCAtagattaatatttgTAAGGCACCCCTCTGAGTAGAgtaatgtgcaacatggacaa<br>catttttttc                            |
| #hsa-miR-506 AU→UC | aactcagccatactatgtgtagtgcctTATTCAGGAAGGTGTACTTATCagattaatatttgTAAGGCACCCCTCTGAGTAGAgtaatgtgcaacatggacaa<br>catttttttc                            |
