# Supplementary material for: A sliding-bulge structure at the Dicer processing site of pre-miRNAs regulates alternative Dicer processing to generate 5′-isomiRs
Source: PubMed Central journal article supplement — Heliyon. 2016 Sep 1;2(9):e00148. doi: 10.1016/j.heliyon.2016.e00148 (PMC5021778; doi:10.1016/j.heliyon.2016.e00148), 2016-09-01
Supplement: mmc8.pdf [file mmc8.pdf]

**Table S4. Sequences of pri-miRNAs and pri-miRNA mutations inserted into the pLL3.7 vector**

| Probe             | Sequence                                                                                         |
|-------------------|--------------------------------------------------------------------------------------------------|
| probe_pre-mir-136 | GCTTAAGAATCCATCATCAAAACAAATGGA                                                                   |
| probe_pre-mir-140 | GCATGACGTAACCTACCATAGGGTA                                                                        |
| probe_pre-mir-203 | GTGCTACAGAACTGTTGAACTGTCA                                                                        |
| probe_pre-mir-323 | ATAAATGAAGCGAACGCGCCACGGA                                                                        |
| probe_pre-mir-363 | CTATTACACCAACCAAAAATTGCATCGTG                                                                    |
| probe_pre-mir-383 | TAATATCCACCCAAAGCCACAGTCA                                                                        |
| probe_pre-mir-409 | CTCCAGATGCAAAGTTGCTCGGGTA                                                                        |
| probe_pre-mir-411 | ACAGATAAAGCGTACGCTATACGGTCTA                                                                     |
| probe_mir-203     | UCUAGUGGUCCUAAACAUUUCA                                                                           |
| probe_mir-506     | TCTACTCAGAAGGGTGCCTTA                                                                            |
| probe_mir-302a    | UCACCAAACAUGGAAGCACUU                                                                            |
| Primer            |                                                                                                  |
| HH+pre203_f       | TAATACGACTCACTATAGGGAGACAAGAACCACTCTGATGAGTCCGTGAGGACGAAAC<br>GGTACCCGGTACCGTCAGTGGTTCTTGACAGTTC |
| Pre203+VS_r       | GATCCTCGGGGCGACGACGCCCTTCTAGTGGTCCCTAAACATTTTC                                                   |
